# Supplementary material for: Effect of whey vs. soy protein supplementation on recovery kinetics following speed endurance training in competitive male soccer players: a randomized controlled trial
Source: PubMed Central journal article supplement (PMC7968192; doi:10.1186/s12970-021-00420-w), 2021-03-16

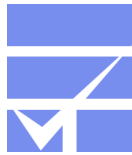

# CONSORT

TRANSPARENT REPORTING of TRIALS

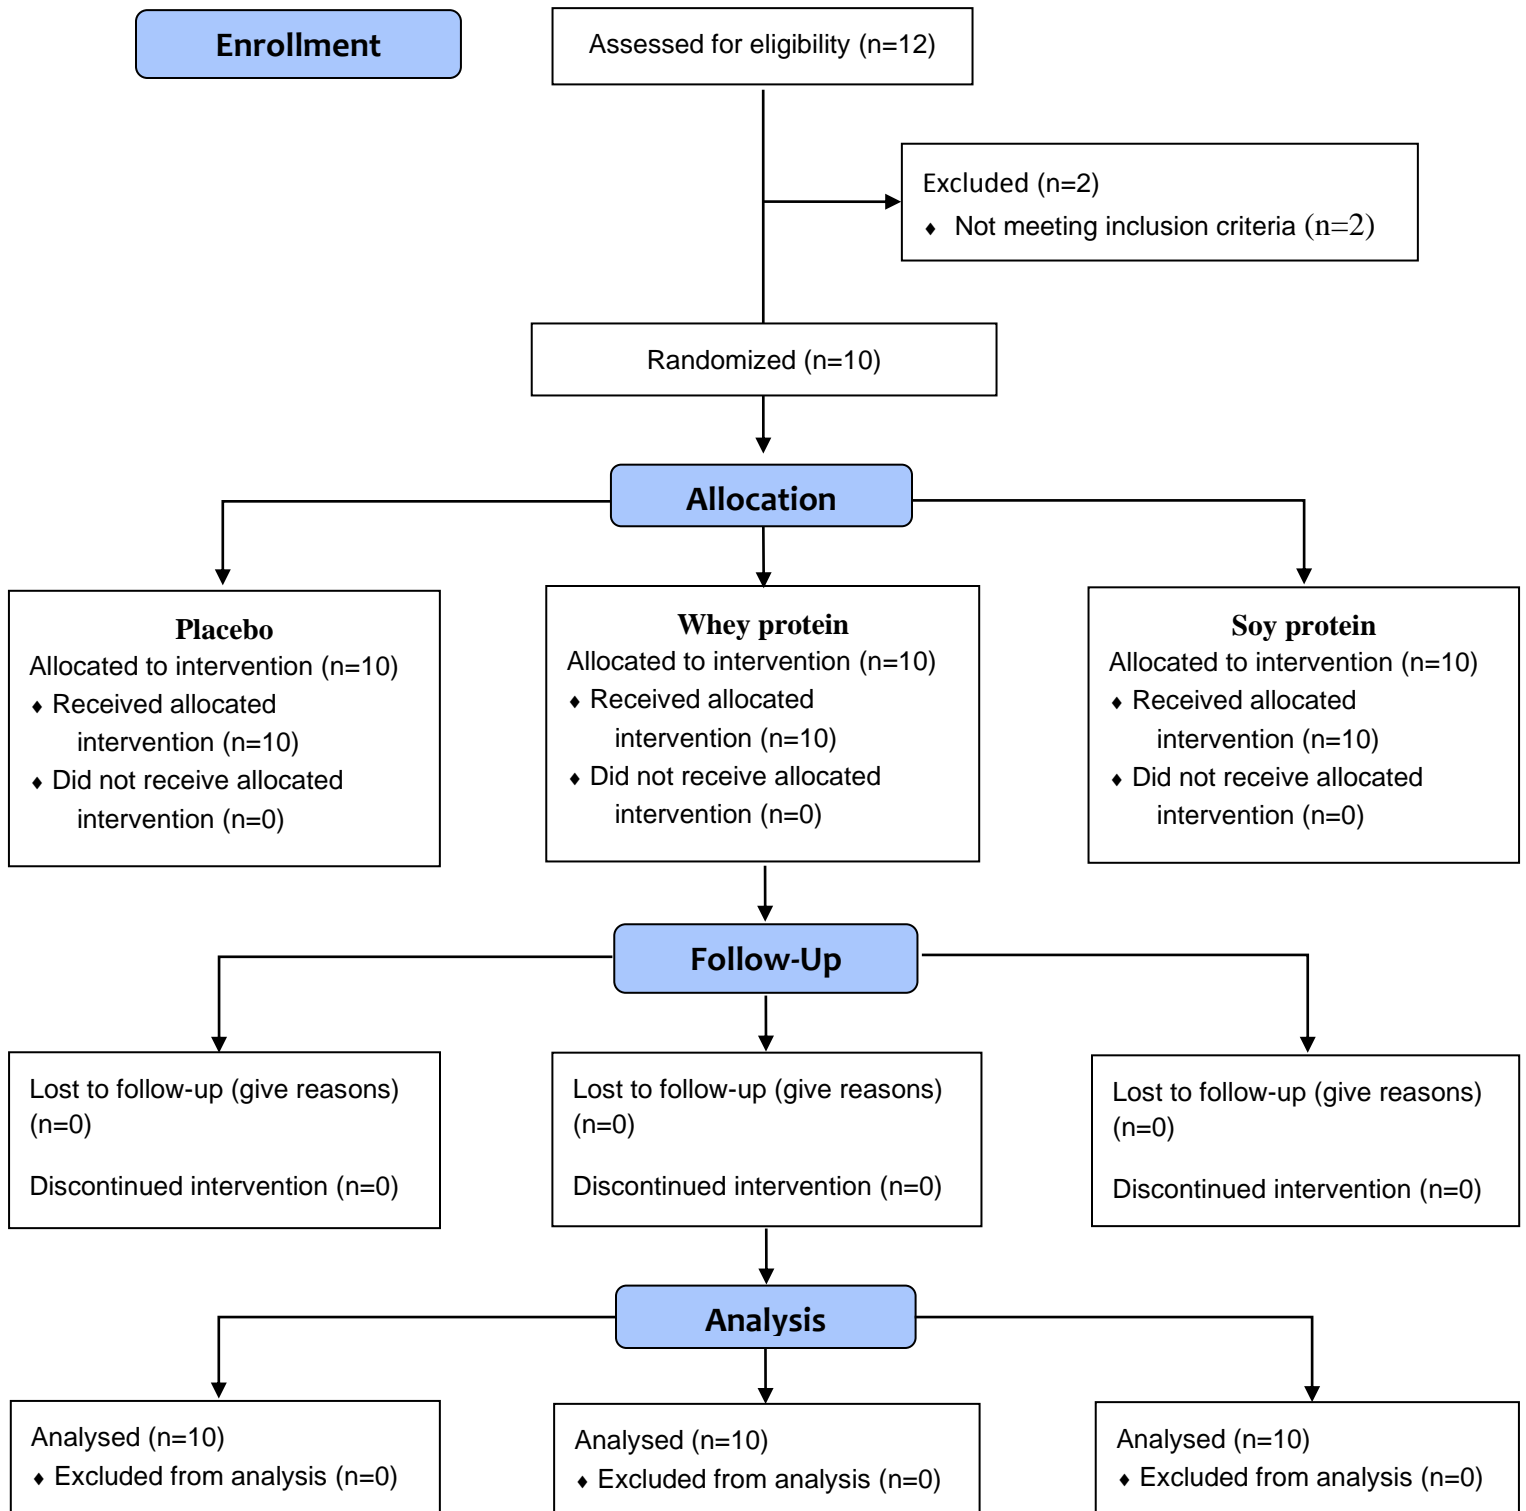

Supplement: 12970_2021_420_MOESM1_ESM.pdf [file 12970_2021_420_MOESM1_ESM.pdf]
